# Supplementary material for: siRNAs Targeting Growth Factor Receptor and Anti-Apoptotic Genes Synergistically Kill Breast Cancer Cells through Inhibition of MAPK and PI-3 Kinase Pathways
Source: MDPI journal article supplement (doi:10.3390/biomedicines6030073), 2018-06-22
Supplement: s1 [file s1]

# siRNAs Targeting Growth Factor Receptor and Anti-Apoptotic Genes Synergistically Kill Breast Cancer Cells Through Inhibition of MAPK and PI-3 Kinase Pathways

Nur Izyani Kamaruzman, Snigdha Tiash, Maeirah Ashaie and Ezharul Hoque Chowdhury \*

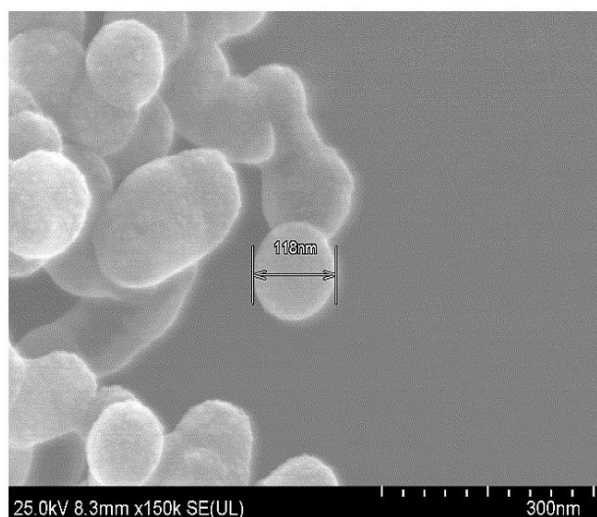

Figure 1: Images of CA particles under a scanning electron microscope (SEM), Incorporation of siRNA along with CA caused no further increase in the size (data not shown here). CA nanoparticles were prepared as mentioned in 'materials and methods' section, with the incorporation of appropriate amount of  $\text{CaCl}_2$  in media, followed by incubation at  $37^\circ\text{C}$  for 30 min. The resulting nanoparticles were centrifuged at 13,000 rpm for 10 min and the supernatant was discarded. The pellet was resuspended in 200  $\mu\text{L}$  milli-Q water. 3  $\mu\text{L}$  of the particle suspension was placed on the glass slide to dry at room temperature. Platinum sputtering was applied on the dried sample and the image was observed through the field-emission SEM. Scale bar, 300 nm.
